# Supplementary material
Source: PubMed Central journal article supplement (PMC3962539)
Supplement: epi-9-286-s01.pdf [file epi-9-286-s01.pdf]

## **Supplemental Material to:**

**Valentina Medici, Noreene M Shibata, Kusum K  
Kharbanda, Mohammad S Islam, Carl L Keen, Kyoungmi  
Kim, Brittany Tillman, Samuel W French, Charles H Halsted,  
Janine M LaSalle**

**Maternal choline modifies fetal liver copper, gene  
expression, DNA methylation, and neonatal growth in the  
tx-j mouse model of Wilson disease**

**Epigenetics 2014; 9(2)**

**<http://dx.doi.org/10.4161/epi.27110>**

**[http://www.landesbioscience.com/journals/epigenetics/  
article/27110](http://www.landesbioscience.com/journals/epigenetics/article/27110)**

**Supplemental Table.** Primer sequences used for qPCR analyses.

| <b>Gene</b>    | <b>Forward Primer 5' to 3'</b> | <b>Reverse Primer 5' to 3'</b> |
|----------------|--------------------------------|--------------------------------|
| <i>Ccnd1</i>   | CAGATGTGAAGTTCATTTCCAACC       | GCAGTCCGGGTCACACTTG            |
| <i>Cpt1a</i>   | GGAGGAGACAGACACCATCCA          | CGTCATGGTAGAGCCAGACCTT         |
| <i>Dnmt1</i>   | CCAGCTGCCAAACGGAGA             | CCTCGGGAGTCTCTGGAGCTA          |
| <i>Dnmt3a</i>  | CACTGGAGTAGGCGCTGAGAC          | CAGCAAAGGGCCTTCCATAG           |
| <i>Dnmt3b</i>  | CCGTTCGACTTGGTGATTGG           | GGGCAGGATTGACGTTAGAGAG         |
| <i>Gapdh</i>   | GAAGCTTGTCATCAACGGGAAG         | TTTGATGTTAGTGGGGTCTCGC         |
| <i>Grp78</i>   | GTGGAGATCATAGCCAACG            | CACATACGACGGCGTGATGC           |
| <i>Mat1a</i>   | TCTGTCCCATACTCACCTCTTCAG       | TGCCCTGAGGGTAGAAGGC            |
| <i>Mat2a</i>   | CAGGAGACCAGGGTTTGATGTT         | GCGTAACCAAGGCAATGTACC          |
| <i>Mtr</i>     | CTGCAGATGTGGCCAGAAAAG          | CAGCCACAAACCTCTTGACTCC         |
| <i>Ppara</i>   | CGATGCTGTCCTCCTTGATGA          | GAAGTCAAACCTGGGTTCCATGAT       |
| <i>Sahh</i>    | ATCCTTGGCCGGCACTTT             | TTCTTTAGCCAGTAGCGGTCCA         |
| <i>Srebplc</i> | CTGGCTTGGTGATGCTATGTTG         | GACCATCAAGGCCCTCAA             |
